# Supplementary material
Source: PubMed Central journal article supplement (PMC2867722)
Supplement: 0912702107_pnas.200912702SI.pdf [file 0912702107_pnas.200912702SI.pdf]

# Supporting Information

Chen et al. 10.1073/pnas.0912702107

## SI Methods

**Informed Consent.** All participants gave written informed consent, and the protocols were reviewed and approved by local institutional review boards.

**Study Design.** The participants in the original genome-wide association study were mainly collected at the University of Michigan in Ann Arbor (collection coordinated by A.S.), at the University of Pennsylvania in Philadelphia (coordinated by D.S.), and at the Mayo Clinic in Rochester, MN (coordinated by A.E.). Cases were classified according to age-related macular degeneration (AMD) diagnosis in the worse eye (neovascularization was considered to be the most severe outcome, large drusen were the least severe outcome). Controls were examined by an ophthalmologist and exhibited no signs of AMD in either eye (they had no large or intermediate drusen).

**Genotyping.** Genotyping used Illumina Human370 Bead Chips and the Illumina Infinium II assay protocol (1). Allele cluster definitions for each SNP were determined using Illumina BeadStudio Genotyping Module version 3.2.32 and the combined intensity data from 99% of the samples; the resulting cluster definitions were then used on all samples. Genotypes were not called if the quality threshold (gencall score) was  $<0.25$ . Genotypes were not released from the Center for Inherited Disease Research (CIDR) for SNPs that failed technical filters for call rate  $<85\%$ ,  $>1$  HapMap replicate error, and  $>4\%$  (autosomal) difference in call rate between sexes. Genotypes were released from CIDR for 344,942 (99.46%) of the attempted SNPs. Blind duplicate reproducibility was 99.992%.

**Genotype Imputation.** To expand the genome coverage, we performed a genome-wide imputation using haplotypes from the HapMap CEU samples as templates (release 22). Imputation was performed using MACH ([www.sph.umich.edu/csg/abecasis/Mach/](http://www.sph.umich.edu/csg/abecasis/Mach/)). For downstream analyses, we filtered out poorly imputed SNPs and focused on markers with estimated  $r^2$  between imputed and true genotypes  $>0.3$ .

**Statistical Analyses.** To investigate the association between each genotyped or imputed SNP and AMD, we first carried out a logistic regression for each SNP assuming the additive model and adjusting for the top two principal components of ancestry (PCA). At  $P < 10^{-6}$ , we identified a total of seven independently associated SNPs in previously reported loci (*CFH*, *ARMS2*, *C3*, *C2/CFB*, and *CFI*). These SNPs were included as covariates in

logistic regression analyses designed to identify additional loci associated with AMD.

**Analysis for Follow-Up Study.** To combine the statistics across different groups for replication, we first selected an arbitrary reference allele for each marker and then calculated a  $z$  statistic summarizing the evidence for association in each study (summarizing both the  $P$  value, in its magnitude, and the direction of effect, in its sign). We then calculated an overall  $z$  statistic as a weighted average of the individual statistics and calculated the corresponding  $P$  value. Weights were proportional to the square root of effective sample size for each study and were selected such that the sum of squared weights = 1.0.

**Association Testing.** Association tests compared allele frequencies between cases and controls for each sample. For samples including only unrelated individuals, the data were also analyzed using simple logistic regression models with age and sex as covariates to verify robustness of results. For the discovery samples, the first two PCAs were used as covariates in all reported analyses, and genotypes for the markers listed in Table 2 (main text) were used as covariates in analyses designed to discover previously uncharacterized loci. For follow-up samples, genotypes at *CFH* and *ARMS2* were included as covariates where available. For samples including related individuals, the data were analyzed with the test of Thornton and McPeck (2).

**Risk Prediction Approach.** To evaluate the cumulative contribution of the alleles identified here to disease risk, we fitted a simple logistic regression model to the data. The effect of each genotype was modeled on a log-additive scale, with no interaction terms between genotypes. Effectively, the model calculates a weighted count of risk alleles at each locus (with each allele weighted by the corresponding locus specific log of the odds ratio). This weighted count corresponds to a fitted probability of disease, which can be used to sort genotypes from high to low predicted risk and to define deciles of fitted risk. We first counted the proportion of affected individuals in each risk decile. In a subsequent analysis, we assigned different weights to cases and controls, designed to reflect the fact that cases are enriched in our sample. Cases were assigned weight  $f_{\text{case}}/p_{\text{case}}$  and controls were assigned weight  $f_{\text{control}}/p_{\text{control}}$ , where  $p_{\text{case}} = 0.65$  and  $p_{\text{control}} = 0.35$  are the fractions of cases and controls in our sample and  $f_{\text{case}} = 0.20$  and  $f_{\text{control}} = 0.80$  are hypothetical fractions of cases and controls in an elderly population at age  $\approx 75$  years. Taking these weights into account, we again divided the sample into deciles, this time ensuring that the summed weights in each decile were identical.

1. Gunderson KL, et al. (2006) Whole-genome genotyping. *Methods Enzymol* 410: 359–376.

2. Thornton T, McPeck MS (2007) Case-control association testing with related individuals: a more powerful quasi-likelihood score test. *Am J Hum Genet* 81:321–337.

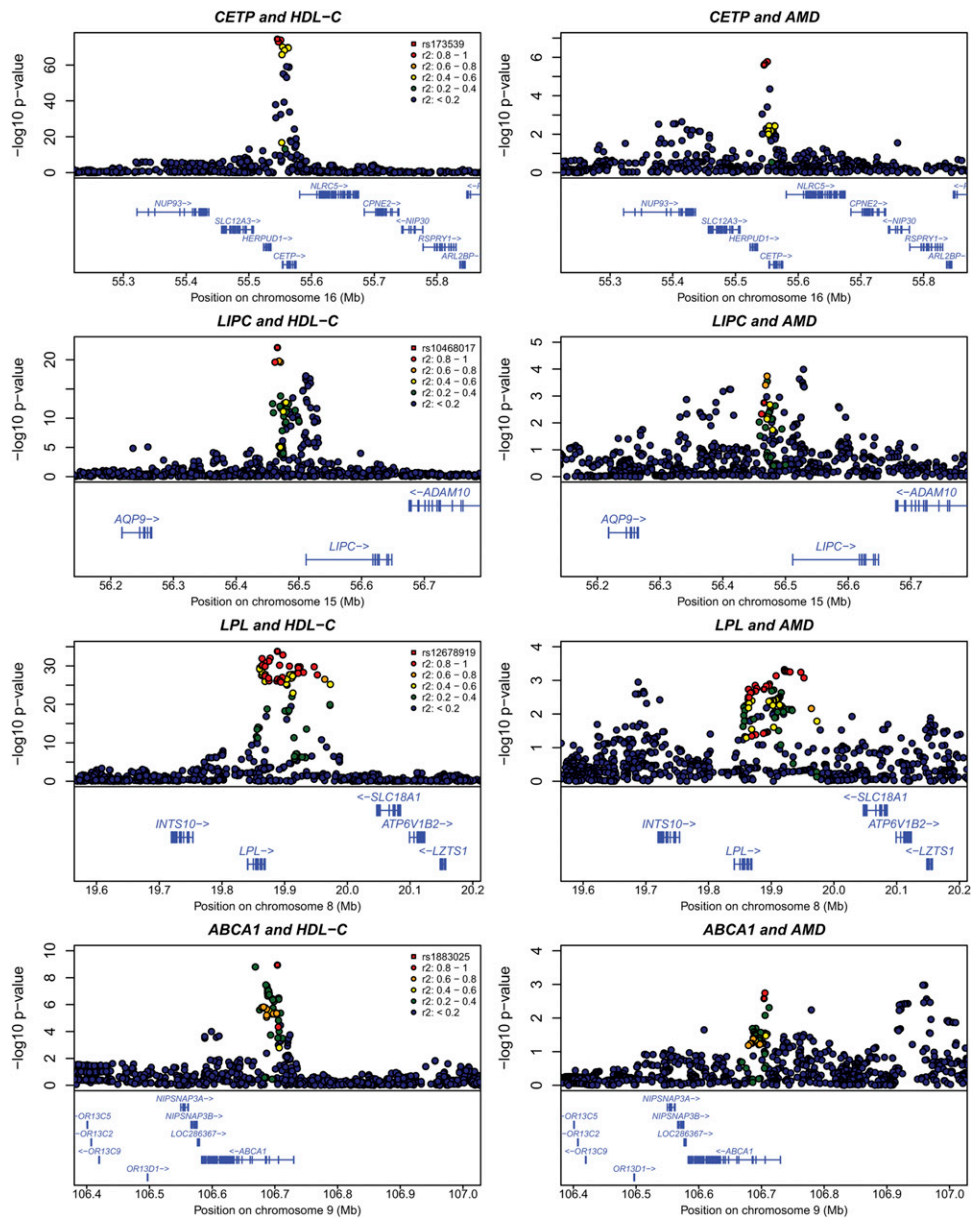

**Fig. S1.** Regional plot of association signals in high-density lipoprotein cholesterol (HDL-c) and AMD. Detailed plots comparing HDL-c association signals (from the discovery sample of Kathiresan et al. [Kathiresan S, et al. (2009) Common variants at 30 loci contribute to polygenic dyslipidemia. *Nat Genet* 41:56–65; *Left*]) and AMD association signals (from the discovery sample in the scan reported here; *Right*). The same marker and linkage disequilibrium proxies are highlighted in each row.



**Table S1. Summary description of discovery samples used in the genome-wide association and replication studies**

| Sample                     | n      | Cases    |                   |                   |                       |                 | Controls |                   |      | Total  |
|----------------------------|--------|----------|-------------------|-------------------|-----------------------|-----------------|----------|-------------------|------|--------|
|                            |        | Male (%) | Age (y) (Average) | Large drusen(%)   | Geographic atrophy(%) | Neovascular (%) | Male (%) | Age (y) (average) |      |        |
| Discovery samples          |        |          |                   |                   |                       |                 |          |                   |      |        |
| Michigan                   | 786    | 36.9     | 79.8              | 14.2              | 21.6                  | 64.2            | 516      | 41.5              | 76.6 | 1,302  |
| Mayo Clinic                | 535    | 36.1     | 77.3              | 46.5              | 13.6                  | 39.8            | 433      | 46.7              | 70.2 | 968    |
| AREDS                      | 440    | 41.0     | 80.8              | None genotyped    | 26.8                  | 73.2            | 0        | 0                 | 0    | 440    |
| Pennsylvania               | 396    | 40.4     | 75.7              | 42.7              | 26.3                  | 31.0            | 201      | 45.3              | 76   | 597    |
| Total                      | 2,157  | 38.2     | 78.6              | 24.5              | 21.6                  | 53.9            | 1,150    | 44.1              | 74.1 | 3,307  |
| Parallel discovery samples |        |          |                   |                   |                       |                 |          |                   |      |        |
| Tufts/MGH*                 | 821    | 46.0     | 80.3              | None genotyped    | 27.5                  | 72.5            | 1,709    | 46.0              | 76.0 | 2,530  |
| Replication samples        |        |          |                   |                   |                       |                 |          |                   |      |        |
| Pittsburgh <sup>†</sup>    | 1,308  | 36.7     | 69.9              | 9.7 <sup>†</sup>  | 18.9                  | 70.0            | 229      | 49.8              | 76.7 | 1,537  |
| Miami/Duke/                | 1,157  | 35.1     | 75.7              | 28.3              | 13.6                  | 58.2            | 514      | 40.5              | 68.4 | 1,671  |
| Vanderbilt                 |        |          |                   |                   |                       |                 |          |                   |      |        |
| Tufts/MGH II               | 868    | 40.0     | 79.7              | None genotyped    | 28.3                  | 71.7            | 789      | 40.0              | 73.0 | 1,657  |
| Johns Hopkins <sup>†</sup> | 665    | 32.8     | 75.5              | 21.8 <sup>†</sup> | 12.4                  | 57.2            | 131      | 31.3              | 74.7 | 796    |
| Penn-NJ                    | 556    | 39.8     | 79.8              | 19.1              | 6.8                   | 65.5            | 347      | 47.0              | 75.6 | 903    |
| Oregon                     | 515    | 34.0     | 79.8              | None genotyped    | 27.2                  | 72.8            | 263      | 45.0              | 74.0 | 778    |
| Massachusetts E. E. I.     | 391    | 40.4     | 76.0              | 10.5              | 1.3                   | 73.6            | 194      | 44.6              | 75.4 | 585    |
| Spain (IDIS-Sgo)           | 353    | 46.2     | 76.7              | None genotyped    | 16.1                  | 83.9            | 282      | 44.7              | 75.1 | 635    |
| Case Western Reserve       | 1,258  | 43.5     | 78.5              | 32.6              | 9.2                   | 40.5            | 1,540    | 50.7              | 72.5 | 2,798  |
| Total                      | 7,071  | 41.1     | 76.2              | 14.9              | 14.0                  | 65.8            | 4,289    | 45.5              | 73.0 | 11,360 |
| Non-European samples       |        |          |                   |                   |                       |                 |          |                   |      |        |
| Japan                      | 678    | 69.0     | 74.8              | None genotyped    | 0.0                   | 100.0           | 336      | 42.0              | 74.2 | 1,014  |
| Grand total <sup>†</sup>   | 10,727 | 40.9     | 77.0              | 15.7              | 16.6                  | 64.0            | 7,484    | 45.3              | 73.9 | 18,211 |

\*The Tufts/MGH samples used here exclude 158 AREDS samples that overlap with our discovery sample.

<sup>†</sup>Proportions of cases with large drusen, geographic atrophy, and neovascular disease do not add up to 100.0% because 8.6% of cases from Johns Hopkins and 0.4% of cases from Pittsburgh had intermediate drusen.

**Table S2. Association results of some published candidate SNPs in our scan**

| Gene            | SNP       | Risk allele/ other | P value in original report | Original report | P value in discovery sample | P value in discovery sample, after adjusting for known loci | Direction of effect, vs. original report |
|-----------------|-----------|--------------------|----------------------------|-----------------|-----------------------------|-------------------------------------------------------------|------------------------------------------|
| <i>TLR3</i>     | rs3775291 | C/T                | $1.2 \times 10^{-7}$       | 1               | 0.526                       | 0.885                                                       | Opposite                                 |
| <i>TLR4</i>     | rs4986790 | G/A                | 0.001                      | 2               | 0.552                       | 0.091                                                       | Same                                     |
| <i>SERPING1</i> | rs2511989 | G/A                | $7.5 \times 10^{-8}$       | 3               | 0.944                       | 0.923                                                       | Same                                     |
| <i>ERCC6</i>    | rs3793784 | G/C                | 0.020                      | 4               | 0.961                       | 0.480                                                       | Same                                     |
| <i>LRP6</i>     | rs7294695 | C/G                | 0.020                      | 5               | 0.543                       | 0.867                                                       | Same                                     |
| <i>CX3CR1</i>   | rs3732378 | A/G                | 0.002                      | 6               | 0.150                       | 0.100                                                       | Same                                     |
| <i>IL8</i>      | rs4073    | T/A                | 0.037                      | 7               | 0.578                       | 0.301                                                       | Same                                     |
| <i>VEGF</i>     | rs2010963 | C/G                | 0.020                      | 5               | 0.302                       | 0.320                                                       | Same                                     |
| <i>VLDLR</i>    | rs2290465 | C/G                | 0.010                      | 5               | 0.782                       | 0.402                                                       | Same                                     |

Previously associated SNPs near *APOE* and *ABCA4* are not listed because they were not genotyped in our sample and could not be imputed confidently using either 1,000 Genomes or HapMap reference haplotypes.

1. Yang Z, et al. (2008) Toll-like receptor 3 and geographic atrophy in age-related macular degeneration. *N Engl J Med* 359:1456–1463.
2. Zarepari S, et al. (2005) Toll-like receptor 4 variant D299G is associated with susceptibility to age-related macular degeneration. *Hum Mol Genet* 14:1449–1455.
3. Ennis S, et al. (2008) Association between the *SERPING1* gene and age-related macular degeneration: a two-stage case-control study. *Lancet* 372:1828–1834.
4. Tuo J, et al. (2006) Synergic effect of polymorphisms in *ERCC6* 5' flanking region and complement factor H on age-related macular degeneration predisposition. *Proc Natl Acad Sci USA* 103:9256–9261.
5. Haines JL, et al. (2006) Functional candidate genes in age-related macular degeneration: significant association with *VEGF*, *VLDLR*, and *LRP6*. *Invest Ophthalmol Vis Sci* 47:329–335.
6. Tuo J, et al. (2004) The involvement of sequence variation and expression of *CX3CR1* in the pathogenesis of age-related macular degeneration. *FASEB J* 18:1297–1299.
7. Goverdhan SV, et al. (2008) Interleukin-8 promoter polymorphism -251A/T is a risk factor for age-related macular degeneration. *Br J Ophthalmol* 92:537–540.



**Table S4. Sample-by-sample results for newly reported loci: rs9621532 (A/C) near TIMP3**

| Sample                 | Cases |     |     |       | Controls |     |     |       | OR                | P                    |
|------------------------|-------|-----|-----|-------|----------|-----|-----|-------|-------------------|----------------------|
|                        | A/A   | A/C | C/C | P(A)  | A/A      | A/C | C/C | P(A)  |                   |                      |
| Discovery              | 2005  | 149 | 3   | 0.964 | 1022     | 125 | 3   | 0.943 | 1.81 (1.42, 2.29) | $3.9 \times 10^{-5}$ |
| Tufts/MGH              | 732   | 62  | 4   | 0.957 | 1466     | 163 | 3   | 0.947 | 1.31 (0.98, 1.74) | 0.016                |
| Tufts/MGH II           | 777   | 69  | 4   | 0.955 | 703      | 75  | 1   | 0.951 | 1.09 (0.85, 1.51) | 0.350                |
| Johns Hopkins          | 626   | 37  | 1   | 0.971 | 113      | 16  | 0   | 0.938 | 2.21 (1.22, 4.03) | 0.008                |
| Penn-NJ                | 510   | 46  | 0   | 0.959 | 295      | 52  | 0   | 0.925 | 1.90 (1.26, 2.86) | 0.002                |
| Oregon                 | 452   | 24  | 0   | 0.975 | 229      | 23  | 0   | 0.954 | 1.88 (1.05, 3.37) | 0.036                |
| Spain(IDIS-Sgo)        | 330   | 17  | 0   | 0.976 | 259      | 17  | 0   | 0.969 | 1.27 (0.64, 2.50) | 0.498                |
| Massachusetts E.E.I.*  | 345   | 39  | 0   | 0.949 | 163      | 26  | 1   | 0.926 | 1.49 (0.90, 2.46) | 0.119                |
| Case Western Reserve   | 1124  | 95  | 8   | 0.955 | 1370     | 147 | 3   | 0.950 | 1.12 (0.87, 1.44) | 0.300                |
| Pittsburgh*            | 169   | 10  | 0   | 0.972 | 130      | 10  | 1   | 0.957 | 1.55 (0.66, 3.63) | 0.011                |
| Miami/Duke/Vanderbilt* | 629   | 69  | 4   | 0.945 | 218      | 30  | 1   | 0.936 | 1.18 (0.77, 1.81) | 0.074                |
| Japan                  | 617   | 37  | 1   | 0.970 | 303      | 27  | 0   | 0.959 | 1.38 (0.84, 2.28) | 0.195                |

Test of heterogeneity:  $Q = 11.47$ ,  $df = 9$ ,  $P$  value = 0.2448

\*Note that for datasets that include related individuals (Pittsburgh, Miami/Due/Vanderbilt, and Massachusetts. E.E. I.), this samples counts include only unrelated individuals. Thus, the results differ from those in Table 3 in the main paper, where all available samples were analyzed using the method of Thornton and McPeck. The tabulated  $P$  values are calculated from the complete family data set.  $P$  values are two sided.

**Table S5. Sample-by-sample results for newly reported loci: rs493258 (C/T) near LIPC**

| Sample                 | Cases |      |     |       | Controls |     |     |       | OR                | P     |
|------------------------|-------|------|-----|-------|----------|-----|-----|-------|-------------------|-------|
|                        | C/C   | C/T  | T/T | P(C)  | C/C      | C/T | T/T | P(C)  |                   |       |
| Discovery              | 691   | 1053 | 413 | 0.564 | 323      | 569 | 258 | 0.528 | 1.21 (1.10, 1.34) | 0.002 |
| Tufts/MGH              | 260   | 391  | 147 | 0.579 | 470      | 782 | 380 | 0.524 | 1.25 (1.11, 1.41) | 0.001 |
| Tufts/MGH II           | 254   | 428  | 172 | 0.548 | 213      | 387 | 182 | 0.520 | 1.12 (0.98, 1.29) | 0.124 |
| Johns Hopkins          | 203   | 315  | 119 | 0.566 | 35       | 58  | 33  | 0.508 | 1.26 (0.96, 1.66) | 0.090 |
| Penn-NJ                | 193   | 273  | 90  | 0.593 | 110      | 179 | 58  | 0.575 | 1.08 (0.89, 1.31) | 0.458 |
| Oregon                 | 167   | 228  | 104 | 0.563 | 78       | 111 | 63  | 0.530 | 1.14 (0.92, 1.42) | 0.235 |
| Spain(IDIS-Sgo)        | 104   | 164  | 79  | 0.536 | 82       | 128 | 64  | 0.533 | 1.01 (0.81, 1.27) | 0.911 |
| Massachusetts E.E.I.*  | 128   | 159  | 88  | 0.553 | 52       | 88  | 35  | 0.549 | 1.02 (0.79, 1.31) | 0.822 |
| Case Western Reserve   | 366   | 595  | 217 | 0.563 | 404      | 726 | 300 | 0.536 | 1.12 (1.00, 1.24) | 0.190 |
| Pittsburgh*            | 66    | 70   | 39  | 0.577 | 52       | 64  | 35  | 0.556 | 1.09 (0.80, 1.49) | 0.104 |
| Miami/Duke/Vanderbilt* | 222   | 337  | 131 | 0.566 | 65       | 149 | 31  | 0.569 | 0.99 (0.80, 1.21) | —     |
| Japan                  | 35    | 200  | 408 | 0.210 | 10       | 102 | 217 | 0.185 | 1.17 (0.94, 1.46) | 0.202 |

Test of heterogeneity:  $Q = 6.96$ ,  $df = 9$ ,  $P = 0.6412$

\*Note that for datasets that include related individuals (Pittsburgh, Miami/Due/Vanderbilt, and Massachusetts. E.E. I.), this samples counts include only unrelated individuals. Thus, the results differ from those in Table 3 in the main paper, where all available samples were analyzed using the method of Thornton and McPeck. The tabulated  $P$  values are calculated from the complete family data set.  $P$  values are two sided.

**Table S6. Sample-by-sample results for newly reported loci: rs3764261 (A/C) near CETP**

| Sample                 | Cases |     |     |       | Controls |     |     |       | OR                | P                    |
|------------------------|-------|-----|-----|-------|----------|-----|-----|-------|-------------------|----------------------|
|                        | A/A   | A/C | C/C | P(A)  | A/A      | A/C | C/C | P(A)  |                   |                      |
| Discovery              | 296   | 979 | 882 | 0.364 | 118      | 486 | 546 | 0.314 | 1.36 (1.26, 1.46) | $1.7 \times 10^{-6}$ |
| Tufts/MGH              | 104   | 377 | 340 | 0.356 | 216      | 784 | 709 | 0.329 | 1.13 (1.00, 1.28) | 0.140                |
| Tufts/MGH II           | —     | —   | —   | —     | —        | —   | —   | —     | —                 | —                    |
| Johns Hopkins          | 87    | 293 | 261 | 0.364 | 24       | 50  | 48  | 0.402 | 0.85 (0.70, 1.04) | 0.268                |
| Penn-NJ                | 58    | 251 | 247 | 0.330 | 31       | 151 | 165 | 0.307 | 1.11 (0.96, 1.29) | 0.306                |
| Oregon                 | 60    | 252 | 197 | 0.365 | 26       | 117 | 110 | 0.334 | 1.15 (0.98, 1.34) | 0.227                |
| Spain(IDIS-Sgo)        | 33    | 145 | 170 | 0.303 | 22       | 107 | 147 | 0.274 | 1.15 (0.97, 1.37) | 0.252                |
| Massachusetts E.E.I.*  | 45    | 178 | 163 | 0.347 | 17       | 87  | 86  | 0.318 | 1.14 (0.95, 1.37) | 0.332                |
| Case Western Reserve   | —     | —   | —   | —     | —        | —   | —   | —     | —                 | —                    |
| Pittsburgh*            | 24    | 77  | 69  | 0.368 | 18       | 55  | 70  | 0.318 | 1.25 (0.99, 1.58) | 0.940                |
| Miami/Duke/Vanderbilt* | —     | —   | —   | —     | —        | —   | —   | —     | —                 | —                    |
| Japan                  | 31    | 228 | 395 | 0.222 | 17       | 80  | 236 | 0.171 | 1.39 (1.17, 1.65) | 0.008                |

Test of heterogeneity:  $Q = 4.18$ ,  $df = 6$ ,  $P = 0.6524$

\*Note that for datasets that include related individuals (Pittsburgh, Miami/Due/Vanderbilt, and Massachusetts. E.E. I.), this samples counts include only unrelated individuals. Thus, the results differ from those in Table 3 in the main paper, where all available samples were analyzed using the method of Thornton and McPeck. The tabulated  $P$  values are calculated from the complete family data set.  $P$  values are two sided.

**Table S7. Sample-by-sample results for newly reported loci: rs12678919 (G/A) near LPL**

| Sample                 | Cases |     |      |       | Controls |     |     |       | OR                | P     |
|------------------------|-------|-----|------|-------|----------|-----|-----|-------|-------------------|-------|
|                        | G/G   | G/A | A/A  | P(G)  | G/G      | G/A | A/A | P(G)  |                   |       |
| Discovery              | 23    | 448 | 1686 | 0.115 | 9        | 206 | 939 | 0.097 | 1.38 (1.17, 1.63) | 0.002 |
| Tufts/MGH              | —     | —   | —    | —     | —        | —   | —   | —     | —                 | —     |
| Tufts/MGH II           | —     | —   | —    | —     | —        | —   | —   | —     | —                 | —     |
| Johns Hopkins          | —     | —   | —    | —     | —        | —   | —   | —     | —                 | —     |
| Penn-NJ                | —     | —   | —    | —     | —        | —   | —   | —     | —                 | —     |
| Oregon                 | 6     | 85  | 416  | 0.096 | 2        | 42  | 208 | 0.091 | 1.06 (0.73, 1.53) | 0.783 |
| Spain(IDIS-Sgo)        | 2     | 81  | 162  | 0.173 | 5        | 63  | 149 | 0.168 | 1.04 (0.74, 1.46) | 0.832 |
| Massachusetts. E.E.I.* | —     | —   | —    | —     | —        | —   | —   | —     | —                 | —     |
| Case Western Reserve   | —     | —   | —    | —     | —        | —   | —   | —     | —                 | —     |
| Pittsburgh*            | 1     | 32  | 141  | 0.098 | 1        | 21  | 127 | 0.077 | 1.30 (0.75, 2.27) | 0.486 |
| Miami/Duke/Vanderbilt* | 5     | 139 | 555  | 0.107 | 3        | 40  | 203 | 0.093 | 1.17 (0.83, 1.66) | 0.385 |
| Japan                  | 10    | 141 | 496  | 0.124 | 6        | 64  | 253 | 0.118 | 1.06 (0.80, 1.42) | 0.668 |

Test of heterogeneity:  $Q = 0.62$ ,  $df = 3$ ,  $P = 0.9826$

\*Note that for datasets that include related individuals (Pittsburgh, Miami/Due/Vanderbilt, and Massachusetts. E.E. I.), this samples counts include only unrelated individuals. Thus, the results differ from those in Table 3 in the main paper, where all available samples were analyzed using the method of Thornton and McPeck. The tabulated  $P$  values are calculated from the complete family data set.  $P$  values are two sided.

**Table S8. Sample-by-sample results for newly reported loci: rs1883025 (G/A) near ABCA1**

| Sample                  | Cases |     |     |       | Controls |     |     |       | OR                | P     |
|-------------------------|-------|-----|-----|-------|----------|-----|-----|-------|-------------------|-------|
|                         | G/G   | G/A | A/A | P(G)  | G/G      | G/A | A/A | P(G)  |                   |       |
| Discovery               | 1171  | 845 | 141 | 0.739 | 571      | 480 | 99  | 0.705 | 1.25 (1.12, 1.40) | 0.003 |
| Tufts/MGH               | —     | —   | —   | —     | —        | —   | —   | —     | —                 | —     |
| Tufts/MGH II            | —     | —   | —   | —     | —        | —   | —   | —     | —                 | —     |
| Johns Hopkins           | —     | —   | —   | —     | —        | —   | —   | —     | —                 | —     |
| Penn-NJ                 | —     | —   | —   | —     | —        | —   | —   | —     | —                 | —     |
| Oregon                  | 299   | 180 | 27  | 0.769 | 126      | 111 | 15  | 0.720 | 1.29 (1.01, 1.65) | 0.039 |
| Spain(IDIS-Sgo)         | 174   | 155 | 17  | 0.727 | 143      | 97  | 35  | 0.696 | 1.16 (0.91, 1.49) | 0.238 |
| Massachusetts. E.E. I.* | 205   | 138 | 42  | 0.712 | 98       | 79  | 10  | 0.735 | 0.89 (0.67, 1.17) | 0.405 |
| Case Western Reserve    | 713   | 418 | 67  | 0.770 | 821      | 563 | 77  | 0.755 | 1.09 (0.96, 1.23) | 0.270 |
| Pittsburgh*             | 104   | 66  | 7   | 0.774 | 89       | 45  | 12  | 0.764 | 1.06 (0.73, 1.53) | 0.318 |
| Miami/Duke/Vanderbilt*  | 378   | 275 | 47  | 0.736 | 130      | 98  | 20  | 0.722 | 1.08 (0.86, 1.36) | 0.858 |
| Japan                   | —     | —   | —   | —     | —        | —   | —   | —     | —                 | —     |

Test of heterogeneity: Q = 4.25, df = 5, P = 0.5137

\*Note that for datasets that include related individuals (Pittsburgh, Miami/Due/Vanderbilt and Massachusetts. E.E. I.), this samples counts include only unrelated individuals. Thus, the results differ from those in Table 3 in the main paper where all available samples were analyzed using the method of Thornton and McPeck. The tabulated P values are calculated from the complete family data set. P values are two sided.

**Table S9. Best genotyped proxy SNPs for reported loci**

| SNP        | Chromosome | Position    | Gene        | P value at imputed SNP | Best genotyped proxy | Allele 1/ allele2 | Cases        |             |      | Controls              |     |     | Rsq | P value at genotyped SNP* |
|------------|------------|-------------|-------------|------------------------|----------------------|-------------------|--------------|-------------|------|-----------------------|-----|-----|-----|---------------------------|
|            |            |             |             |                        |                      |                   | 1/1          | 1/2         | 2/2  | 1/1                   | 1/2 | 2/2 |     |                           |
| rs10737680 | 1          | 194,946,078 | CFH         | $1.6 \times 10^{-76}$  | rs1329428            | A/G               | 86/685/1384  | 214/571/365 | 1.00 | $5.2 \times 10^{-76}$ |     |     |     |                           |
| rs3793917  | 10         | 124,209,265 | ARMS2/HTRA1 | $4.1 \times 10^{-60}$  | rs6585827            | G/A               | 377/993/782  | 335/557/256 | 0.32 | $7.5 \times 10^{-22}$ |     |     |     |                           |
| rs429608   | 6          | 32,038,441  | C2/CFB      | $2.5 \times 10^{-21}$  | rs429608             | A/G               | 18/311/1827  | 27/311/812  | 1.00 | $2.5 \times 10^{-21}$ |     |     |     |                           |
| rs2230199  | 19         | 6,669,387   | C3          | $1.0 \times 10^{-10}$  | rs2250656            | G/A               | 139/775/1243 | 107/491/552 | 0.08 | $1.3 \times 10^{-7}$  |     |     |     |                           |
| rs2285714  | 4          | 110,858,259 | CFI         | $3.4 \times 10^{-7}$   | rs2285714            | T/C               | 462/1076/617 | 187/534/429 | 1.00 | $3.4 \times 10^{-7}$  |     |     |     |                           |
| rs1329424  | 1          | 194,912,799 | CFH         | $6.4 \times 10^{-16}$  | rs2019724            | G/A               | 271/998/886  | 432/546/172 | 0.79 | $1.3 \times 10^{-14}$ |     |     |     |                           |
| rs9380272  | 6          | 32,013,989  | C2/CFB      | $2.3 \times 10^{-8}$   | rs9332702            | G/C               | 0/67/2089    | 0/27/1123   | 0.50 | $1.1 \times 10^{-7}$  |     |     |     |                           |
| rs9621532  | 22         | 31,414,511  | SYN3/TIMP3  | $3.9 \times 10^{-5}$   | rs135150             | C/T               | 45/519/1592  | 32/330/787  | 0.14 | 0.001                 |     |     |     |                           |
| rs493258   | 15         | 56,475,172  | LIPC        | $2.1 \times 10^{-3}$   | rs1532085            | A/G               | 255/949/951  | 179/509/462 | 0.64 | 0.002                 |     |     |     |                           |
| rs3764261  | 16         | 55,550,825  | CETP        | $1.4 \times 10^{-6}$   | rs3764261            | T/G               | 296/979/882  | 118/485/546 | 1.00 | $1.4 \times 10^{-6}$  |     |     |     |                           |

\*The second cluster is conditional on the five SNPs in the first cluster. The third cluster is conditional on the seven SNPs above. Marginally, the SNPs in second cluster are not significant.

**Table S10. Association results in discovery sample for different analysis models**

| SNP        | Notable nearby genes | Analysis covariates   |                       |                                     |                                  |
|------------|----------------------|-----------------------|-----------------------|-------------------------------------|----------------------------------|
|            |                      | None                  | PCA                   | PCA and index SNPs at previous loci | PCA, previous loci, age, and sex |
| rs10737680 | CFH                  | $2.5 \times 10^{-78}$ | $1.6 \times 10^{-76}$ | —                                   | —                                |
| rs3793917  | ARMS2                | $1.7 \times 10^{-60}$ | $4.1 \times 10^{-60}$ | —                                   | —                                |
| rs429608   | C2/CFB               | $4.7 \times 10^{-21}$ | $2.5 \times 10^{-21}$ | —                                   | —                                |
| rs2230199  | C3                   | $3.6 \times 10^{-11}$ | $1.0 \times 10^{-10}$ | —                                   | —                                |
| rs2285714  | CFI                  | $8.0 \times 10^{-8}$  | $3.4 \times 10^{-7}$  | —                                   | —                                |
| rs9621532  | TIMP3                | $5.9 \times 10^{-5}$  | $2.6 \times 10^{-4}$  | $4.5 \times 10^{-5}$                | $7.1 \times 10^{-4}$             |
| rs493258   | LIPC                 | $5.1 \times 10^{-3}$  | $6.9 \times 10^{-3}$  | $3.6 \times 10^{-3}$                | $1.1 \times 10^{-2}$             |
| rs3764261  | CETP                 | $5.8 \times 10^{-5}$  | $1.2 \times 10^{-4}$  | $4.6 \times 10^{-6}$                | $9.5 \times 10^{-6}$             |
| rs12678919 | LPL                  | $1.7 \times 10^{-2}$  | $2.0 \times 10^{-2}$  | $4.0 \times 10^{-3}$                | $2.9 \times 10^{-3}$             |
| rs1883025  | ABCA1                | $3.4 \times 10^{-3}$  | $6.4 \times 10^{-3}$  | $5.2 \times 10^{-3}$                | $4.9 \times 10^{-3}$             |





**THE CAPT INVESTIGATIVE GROUP- Genetic Testing Subset  
West Coast Retina, San Francisco, CA**

Robert N. Johnson, MD  
Everett Ai, MD  
H. Richard McDonald, MD  
Margaret Stolarczuk, OD

**University of South Florida Eye Institute, Tampa, FL**

Peter Reed Pavan, MD  
Karina K. Billiris, MD  
Mohan Iyer, MD  
Matthew M. Menosky, MD  
Scott E. Pautler, MD  
Sharon M. Millard, RN, COT

**Emory Eye Center, Atlanta, GA**

Baker Hubbard III, MD  
Thomas Aaberg, Sr., MD  
Lindy DuBois, MEd, MMSC, CO, COMT

**Northwestern University, Chicago, IL**

Alice Lyon, MD  
Susan Anderson-Nelson, MD  
Lee M. Jampol, MD  
David V. Weinberg, MD  
Annie Muñana, RN  
Zuzanna Rozenbajgier, MA

**Illinois Retina Associates, Harvey & Skokie IL**

David Orth, MD  
Jack Cohen, MD  
Matthew MacCumber, MD  
Celeste Figliulo  
Liz Porcz

**University of Iowa, Iowa City, IA**

James Folk, MD  
H. Culver Boldt, MD  
Stephen R. Russell, MD  
Rachel Ivins, CCRC  
Connie J. Hinz, COT

**Ophthalmology & Visual Sciences at the University of Louisville,  
Louisville, KY**

Charles C. Barr, MD  
Steve Bloom, MD  
Ken Jaegers, MD  
Brian Kritchman, MD  
Greg Whittington, PsyS

**Ophthalmic Consultants of Boston, Boston, MA**

Jeffrey Heier, MD  
Albert R. Frederick, Jr., MD  
Michael G. Morley, MD  
Trexler Topping, MD  
Heather L. Davis

**Wilmer Ophthalmological Institute, The Johns Hopkins University,  
Baltimore, MD**

Susan B. Bressler, MD  
Neil M. Bressler, MD  
Warren Doll, COA

**Associated Retinal Consultants, Royal Oak, MI**

Michael Trese, MD  
Antonio Capone, MD  
Bruce R. Garretson, MD  
Tarek S. Hassan, MD  
Alan J. Ruby, MD  
Tammy Osentoski, RN

**Mayo Clinic, Rochester, MN**

Colin A. McCannel, MD  
Margaret J. Ruszczyk, CCRA

**Barnes Retina Institute, St. Louis, MO**

Gilbert Grand, MD  
Kevin Blinder, MD  
Nancy M. Holekamp, MD  
Daniel P. Joseph, MD, PhD  
Gaurav Shah, MD  
Ginny S. Nobel, COT

**Southeast Clinical Research Associates Charlotte, NC**

Andrew N. Antoszyk, MD  
David J. Browning, MD, PhD  
Alison H Stallings

**Retina Associates of Cleveland, Cleveland & Lakewood, OH**

Lawrence J. Singerman, MD  
David Miller, MD  
Michael Novak, MD  
Scott Pendergast, MD  
Hernando Zegarra, MD  
Stephanie A. Schura, COT  
Sheila Smith-Brewer, CRA, COMT, FOPS

**The Ohio State University, Columbus, OH**

Frederick H. Davidorf, MD  
Robert Chambers, DO  
Louis Chorich, MD  
Jill Salerno, COA

**Retina Northwest, Portland, OR**

Richard F. Dreyer, MD  
Colin Ma, MD  
Marcia R. Kopfer, COT

**Casey Eye Institute, Portland, OR**

Michael L. Klein, MD  
David J. Wilson, MD  
Susan K. Nolte

**University of Pennsylvania, Philadelphia, PA**

Juan E. Grunwald, MD  
Alexander J. Brucker, MD  
Josh Dunaief, MD, PhD  
Stuart L. Fine, MD  
Albert M. Maguire, MD  
Robert A. Stoltz, MD, PhD  
Monique N. McRay

**Texas Retina Associates, Dallas & Arlington, Texas**

Gary Edd Fish, MD  
Rajiv Anand, MD  
Rand Spencer, MD  
Jean Arnwine

**University of Wisconsin, Madison, WI**

Suresh R. Chandra, MD  
Michael Altaweel, MD  
Barbara Blodi, MD  
Justin Gottlieb, MD  
Michael Ip, MD  
T. Michael Nork, MD  
Jennie Perry-Raymond

**CAPT Chairman's Office, University of Pennsylvania,  
Philadelphia, PA.**

Stuart L. Fine, MD

**CAPT Coordinating Center, University of Pennsylvania  
Philadelphia, PA.**

Maureen G. Maguire, PhD  
Mary Brightwell-Arnold  
Sandra Harkins  
Ellen Peskin, MA, CCRP  
Gui-Shuang Ying, PhD

**National Eye Institute**

Natalie Kurinij, PhD
